# Supplementary material
Source: PubMed Central journal article supplement (PMC2767223)
Supplement: neo1111_1216SD1.pdf [file neo1111_1216SD1.pdf]

**Table W1.** Real-time PCR Primers.

|               |                                                       |                                                                 |                |
|---------------|-------------------------------------------------------|-----------------------------------------------------------------|----------------|
| <i>17BHS3</i> | Hydroxysteroid (17-beta) dehydrogenase 3              | 5': CTGAAGCTCAACACCAAGGTCA<br>3': CTGCTCCTCTGGTCCTCTTCAG        | NM_000197      |
| <i>AR</i>     | Androgen receptor                                     | 5': GGACTTGTGCATGCGGTACTCA<br>3': CCTGGCTTCCGCAACTTACAC         | NM_000044      |
| <i>AGR2</i>   | Anterior gradient homolog 2 ( <i>Xenopus laevis</i> ) | 5': GTCCCCAGGATTATGTTTGTGACC<br>3': AGTCTTCTCACACTTCTTCTGTTTC   | NM_006408      |
| <i>AK5</i>    | Adenylate kinase 5                                    | 5': GGAGGTGAAGCAAGGGGAAGAGTT<br>3': TCCTTTGGAGAAGGCGGTTGGTC     | NM_174858.1    |
| <i>AKR1C3</i> | Aldo-keto reductase family 1, member C3               | 5': GAGAAGTAAAGCTTTGGAGGTCACA<br>3': CAACCTGCTCCTCATTATGTATAA   | NM_003739      |
| <i>GPR64</i>  | G protein-coupled receptor 64                         | 5': CCAAAGAAA ATGTCAGGAAGCAATGG<br>3': AGCAGTGTGGTGGAGTTAGTGGAG | NM_001079858.1 |
| <i>hK2</i>    | Human glandular kallikrein 2                          | 5': ATGTTGTGTGCTGGGCTCTGGAC<br>3': GGTGGC TCGGATCCTGTCCTTG      | NM_005551      |
| <i>ODC 1</i>  | Ornithine decarboxylase 1                             | 5': ATGTGGGTGATTGGATGCTCTTTGA<br>3': CAGGCTGCTCTGTGGCGTTTCAT    | NM_002539      |
| <i>PSA</i>    | Prostate-specific antigen                             | 5': CCCCAGAATCACCCGAGCAG<br>3': ACCAGAGGAGTTCTTGACCCCAAAA       | NM_001648      |
| <i>SAA2</i>   | Serum amyloid A2                                      | 5': TGCTCGGGGGAACATATGATGCTG<br>3': GTCGGAAGTGATTGGGGTCTCTG     | NM_030754      |
| <i>SRD5A1</i> | Steroid-5-alpha-reductase, alpha polypeptide 1        | 5': CCTGTTGAATGCTTCATGACTTG<br>3': TAAGGCAAAGCAATGCCAGATG       | NM_001047      |
| <i>RUNX1</i>  | Runt-related transcription factor 1                   | 5': CTCCTGAACCACTCCACTGCCT<br>3': GACCCACATTCTGCCTTCCTCATAA     | NM_001001890   |

**Table W2.** Changes in Androgen-Regulated Genes by HE3235.

| Gene Symbol          | Gene Name                                                                                                                                                                                                            | Fold Change |
|----------------------|----------------------------------------------------------------------------------------------------------------------------------------------------------------------------------------------------------------------|-------------|
| Increased expression |                                                                                                                                                                                                                      |             |
| <i>SAA2</i>          | Serum amyloid A2                                                                                                                                                                                                     | 5.8         |
| <i>FER1L3</i>        | fer-1-like 3, myoferlin ( <i>C. elegans</i> )                                                                                                                                                                        | 4.1         |
| <i>RUNX1</i>         | Runt-related transcription factor 1<br>(acute myeloid leukemia 1; <i>aml1</i> oncogene)                                                                                                                              | 3.9         |
| <i>GPR64</i>         | G protein-coupled receptor 64                                                                                                                                                                                        | 3.0         |
| <i>LOX</i>           | Lysyl oxidase                                                                                                                                                                                                        | 2.5         |
| <i>RIS1</i>          | Ras-induced senescence 1                                                                                                                                                                                             | 2.5         |
| <i>PKNOX2</i>        | PBX/knotted 1 homeobox 2                                                                                                                                                                                             | 2.3         |
| <i>RBM24</i>         | RNA binding motif protein 24                                                                                                                                                                                         | 2.3         |
| <i>ABCG1</i>         | ATP-binding cassette, subfamily G (WHITE),<br>member 1                                                                                                                                                               | 2.2         |
| <i>GDF15</i>         | Growth differentiation factor 15                                                                                                                                                                                     | 2.2         |
| <i>ODC1</i>          | Ornithine decarboxylase 1                                                                                                                                                                                            | 2.2         |
| <i>TFF1</i>          | Trefoil factor 1 (breast cancer, estrogen-inducible<br>sequence expressed in)                                                                                                                                        | 2.2         |
| <i>ABCC4</i>         | ATP-binding cassette, subfamily C (CFTR/MRP),<br>member 4                                                                                                                                                            | 2.1         |
| <i>CDH26</i>         | Cadherin-like 26                                                                                                                                                                                                     | 2.0         |
| <i>GDA</i>           | Guanine deaminase                                                                                                                                                                                                    | 2.0         |
| <i>CDC42EP2</i>      | CDC42 effector protein (Rho GTPase binding) 2                                                                                                                                                                        | 2.0         |
| <i>IL1R1</i>         | Interleukin 1 receptor, type I                                                                                                                                                                                       | 2.0         |
| <i>FADS1</i>         | Fatty acid desaturase 1                                                                                                                                                                                              | 2.0         |
| <i>PXDN</i>          | Peroxidase homolog ( <i>Drosophila</i> )                                                                                                                                                                             | 2.0         |
| <i>ChGn</i>          | Chondroitin beta1,4 <i>N</i> -acetylgalactosaminyltransferase                                                                                                                                                        | 2.0         |
| <i>AZGP1</i>         | alpha-2-Glycoprotein 1, zinc                                                                                                                                                                                         | 2.0         |
| <i>FABP5</i>         | Fatty acid binding protein 5 (psoriasis-associated)                                                                                                                                                                  | 1.9         |
| <i>S100A11</i>       | S100 calcium binding protein A11 (calgizzarin)                                                                                                                                                                       | 1.9         |
| <i>LOC114984</i>     | Hypothetical protein BC014089                                                                                                                                                                                        | 1.9         |
| <i>MAF</i>           | <i>v-maf</i> musculoaponeurotic fibrosarcoma<br>oncogene homolog (avian)                                                                                                                                             | 1.9         |
| <i>LGALS3</i>        | Lectin, galactoside-binding, soluble, 3 (galectin 3)                                                                                                                                                                 | 1.9         |
| <i>GPX3</i>          | Glutathione peroxidase 3 (plasma)                                                                                                                                                                                    | 1.9         |
| <i>LOC645904</i>     | Similar to mitotic spindle assembly checkpoint<br>protein MAD1 (mitotic arrest deficient-like protein 1)<br>(MAD1-like 1) (mitotic checkpoint MAD1<br>protein-homolog) (HsMAD1) (hMAD1)<br>(Tax-binding protein 181) | 1.9         |
| <i>SAT</i>           | Spermidine/spermine <i>N</i> 1-acetyltransferase                                                                                                                                                                     | 1.9         |
| <i>CASP10</i>        | Caspase 10, apoptosis-related cysteine peptidase                                                                                                                                                                     | 1.8         |
| <i>CRISP3</i>        | Cysteine-rich secretory protein 3                                                                                                                                                                                    | 1.8         |
| <i>PPM1E</i>         | Protein phosphatase 1E (PP2C domain containing)                                                                                                                                                                      | 1.8         |
| <i>CTBP1</i>         | C-terminal binding protein 1                                                                                                                                                                                         | 1.8         |
| <i>C15orf48</i>      | Chromosome 15 open reading frame 48                                                                                                                                                                                  | 1.8         |
| <i>PGC</i>           | Progastricin (pepsinogen C)                                                                                                                                                                                          | 1.8         |
| <i>PVRL3</i>         | Poliovirus receptor-related 3                                                                                                                                                                                        | 1.8         |
| <i>C21orf122</i>     | Chromosome 21 open reading frame 122                                                                                                                                                                                 | 1.7         |
| <i>RPL36A</i>        | Ribosomal protein L36a                                                                                                                                                                                               | 1.7         |
| <i>SLC26A2</i>       | Solute carrier family 26 (sulfate transporter), member 2                                                                                                                                                             | 1.7         |
| <i>NFKBIZ</i>        | Nuclear factor of kappa light polypeptide<br>gene enhancer in B-cells inhibitor, zeta                                                                                                                                | 1.7         |
| <i>AGR2</i>          | Anterior gradient 2 homolog ( <i>Xenopus laevis</i> )                                                                                                                                                                | 1.7         |
| <i>MICAL1</i>        | Microtubule-associated monooxygenase,<br>calponin and LIM domain containing 1                                                                                                                                        | 1.7         |
| <i>LFNG</i>          | Lunatic fringe homolog ( <i>Drosophila</i> )                                                                                                                                                                         | 1.7         |
| <i>MRPL33</i>        | Mitochondrial ribosomal protein L33                                                                                                                                                                                  | 1.7         |
| <i>AMPD3</i>         | Adenosine monophosphate deaminase (isoform E)                                                                                                                                                                        | 1.7         |
| <i>MGC33839</i>      | Hypothetical protein MGC33839                                                                                                                                                                                        | 1.7         |
| <i>RPLP1</i>         | Ribosomal protein, large, P1                                                                                                                                                                                         | 1.7         |
| <i>ZNF33A</i>        | Zinc finger protein 33A                                                                                                                                                                                              | 1.6         |
| <i>AMACR</i>         | alpha-Methylacyl-CoA racemase                                                                                                                                                                                        | 1.6         |
| <i>RPL21</i>         | Ribosomal protein L21                                                                                                                                                                                                | 1.6         |
| <i>GRHL2</i>         | Grainyhead-like 2 ( <i>Drosophila</i> )                                                                                                                                                                              | 1.6         |
| <i>SUMO2</i>         | SMT3 suppressor of mif two 3 homolog 2 (yeast)                                                                                                                                                                       | 1.6         |
| <i>RAB32</i>         | RAB32, member RAS oncogene family                                                                                                                                                                                    | 1.6         |
| <i>C6orf166</i>      | Chromosome 6 open reading frame 166                                                                                                                                                                                  | 1.6         |
| <i>MT1G</i>          | Metallothionein 1G                                                                                                                                                                                                   | 1.6         |
| <i>GNE</i>           | Glucosamine (UDP- <i>N</i> -acetyl)-2-epimerase/<br><i>N</i> -acetylmannosamine kinase                                                                                                                               | 1.6         |
| <i>POPDC3</i>        | Popeye domain containing 3                                                                                                                                                                                           | 1.6         |
| <i>TIMP2</i>         | TIMP metalloproteinase inhibitor 2                                                                                                                                                                                   | 1.6         |
| <i>CLDN8</i>         | Claudin 8                                                                                                                                                                                                            | 1.6         |
| <i>LIPG</i>          | Lipase, endothelial                                                                                                                                                                                                  | 1.6         |

**Table W2.** (continued)

| Gene Symbol          | Gene Name                                                                                                                                                         | Fold Change |
|----------------------|-------------------------------------------------------------------------------------------------------------------------------------------------------------------|-------------|
| <i>RFPL1</i>         | Ret finger protein-like 1                                                                                                                                         | 1.6         |
| <i>LONPL</i>         | Peroxisomal LON protease like                                                                                                                                     | 1.6         |
| <i>ARHGEF10</i>      | Rho guanine nucleotide exchange factor<br>(GEF) 10                                                                                                                | 1.6         |
| <i>RHOBTB3</i>       | Rho-related BTB domain containing 3                                                                                                                               | 1.6         |
| <i>C14orf78</i>      | Chromosome 14 open reading frame 78                                                                                                                               | 1.6         |
| <i>SAA3</i>          | Serum amyloid A3                                                                                                                                                  | 1.6         |
| <i>FER1L4</i>        | Fer-1-like 3, myoferlin ( <i>C. elegans</i> )                                                                                                                     | 1.6         |
| Decreased expression |                                                                                                                                                                   |             |
| <i>JUN</i>           | <i>v-jun</i> sarcoma virus 17 oncogene homolog (avian)                                                                                                            | -1.6        |
| <i>IRX5</i>          | Iroquois homeobox protein 5                                                                                                                                       | -1.6        |
| <i>SLC3A1</i>        | Solute carrier family 3 (cystine, dibasic and<br>neutral amino acid transporters, activator of<br>cystine, dibasic and neutral amino acid transport),<br>member 1 | -1.7        |
| <i>TFPI</i>          | Tissue factor pathway inhibitor (lipoprotein-associated<br>coagulation inhibitor)                                                                                 | -1.7        |
| <i>JAG1</i>          | Jagged 1 (Alagille syndrome)                                                                                                                                      | -1.9        |
| <i>CD44</i>          | CD44 antigen (Indian blood group)                                                                                                                                 | -2.0        |
| <i>AR</i>            | Androgen receptor (dihydrotestosterone receptor;<br>testicular feminization; spinal and bulbar<br>muscular atrophy; Kennedy disease)                              | -3.1        |
| <i>AK5</i>           | Adenylate kinase 5                                                                                                                                                | -3.7        |

**Table W3.** Steroidogenesis Enzymes.

| Gene Symbol    | Gene Name                                                                                                                 |
|----------------|---------------------------------------------------------------------------------------------------------------------------|
| <i>AKR1C1</i>  | Aldo-keto reductase family 1, member C1 (dihydrodiol dehydrogenase 1;<br>20-alpha (3-alpha)-hydroxysteroid dehydrogenase) |
| <i>AKR1C3</i>  | Aldo-keto reductase family 1, member C3 (3-alpha hydroxysteroid<br>dehydrogenase, type II)                                |
| <i>CYP11A1</i> | Cytochrome P450, family 11, subfamily A, polypeptide 1                                                                    |
| <i>CYP17A1</i> | Cytochrome P450, family 17, subfamily A, polypeptide 1                                                                    |
| <i>FASN</i>    | Fatty acid synthase                                                                                                       |
| <i>HSD17B1</i> | Hydroxysteroid (17-beta) dehydrogenase 1                                                                                  |
| <i>HSD17B2</i> | Hydroxysteroid (17-beta) dehydrogenase 2                                                                                  |
| <i>HSD17B3</i> | Hydroxysteroid (17-beta) dehydrogenase 3                                                                                  |
| <i>HSD17B4</i> | Hydroxysteroid (17-beta) dehydrogenase 4                                                                                  |
| <i>HSD17B6</i> | Hydroxysteroid (17-beta) dehydrogenase 6                                                                                  |
| <i>SRD5A1</i>  | Steroid-5-alpha-reductase, alpha polypeptide 1 (3-oxo-5 alpha-steroid<br>delta 4-dehydrogenase alpha 1)                   |
| <i>UGT2B15</i> | UDP glucuronosyltransferase 2 family, polypeptide B15                                                                     |
| <i>UGT2B17</i> | UDP glucuronosyltransferase 2 family, polypeptide B17                                                                     |
